# Supplementary material
Source: Springer Nature journal article supplement (https://www.springermedizin.de/resource/supplementary/12998_2008_85_MOESM1_ESM.pdf/9623522)
Supplement: MOESM1 [file 9623522]

**PERUSTIEDOT**

**Potilas No.:** \_\_\_\_\_

Rastita / täytä sopivin vaihtoehto.

**1. Sukupuoli**

Mies

Nainen

**2. Ikä \_\_\_\_\_ vuotta**

**3. Oire**

- a) Kipu alaselässä  Kyllä  Ei  
b) Kipu jalassa  Kyllä  Ei

**4. Kivun voimakkuus edellisen vuorokauden aikana**

Ei kipua  Lievä  Kohtalainen  Kova  Sietämätön

**5. Tämän hetkisten oireiden kesto**

1 – 7 vrk  8 – 14 vrk  Yli 14 vrk

**6. Oireiden kokonaiskesto kaikkiaan edellisen vuoden aikana**

- Korkeintaan 30 päivää, ajoittainen  
 Korkeintaan 30 päivää, päivittäin  
 Yli 30 päivää, ajoittainen  
 Yli 30 päivää, päivittäin

**7. Onko potilaalla vaikeuksia**

- a) kääntyä sängyssä?  Kyllä  Ei  
b) nukkua?  Kyllä  Ei  
c) laittaa sukkia/kenkiä?  Kyllä  Ei  
d) kävellä?  Kyllä  Ei  
e) nousta istumasta?  Kyllä  Ei

**8. Havaitsiko potilas parannusta olossaan välittömästi hoidon jälkeen?**

- Kyllä                       Ei                       Ei hoidettu ensikäynnillä

**9. Millainen on potilaan terveydentila yleisesti ottaen?**

- Erinomainen  
 Aika hyvä  
 Aika huono  
 Erittäin huono  
 En osaa sanoa

**10. Onko potilas viimeisen vuoden aikana kärsinyt alaselkävun lisäksi muista selkä- tai niskavaivoista**

- En  
 Kyllä, yhteensä 30 päivää tai vähemmän  
 Kyllä, yhteensä yli 30 päivää

**11. Potilaan paino: \_\_\_\_\_ kg**

**12. Potilaan pituus: \_\_\_\_\_ cm**

---

(English translation)

**Base-Line interview:**

**1. Sex:**                      Male/ female

**2. Age:**                      .....years

**3. Symptom:** Low back pain                      Yes/No  
                                         Leg pain                                      Yes/No

**4. Intensity of pain during the past 24 hours?**

No pain/Mild/Moderate/Severe/unbearable

**5. Duration of present symptoms?**

1-7 days

8-14 days

More than 14 days

**6. The overall duration of symptoms during the past year:**

No more than 30 days, not constant

No more than 30 days, daily

More than 30 days, not constant

More than 30 days, daily

**7. Has the patient difficulties in...**

|                               |        |
|-------------------------------|--------|
| ...turning in bed             | Yes/No |
| ...sleeping                   | Yes/No |
| ...putting the socks/shoes on | Yes/No |
| ...walking                    | Yes/No |
| ...standing up from sitting   | Yes/No |

**8. Did the patient feel better right after treatment?**

Yes/No/No treatment at first visit

**9. Patients weight**            ..... kg

**10. Patients height**            ..... cm
